# Supplementary material
Source: PubMed Central journal article supplement (PMC6496084)
Supplement: AAC.00107-19-s0001.pdf [file AAC.00107-19-s0001.pdf]

## Supplemental Material

### Supplemental Methods

The Multi-site Gram-negative Surveillance Initiative (MuGSI) is a part of the Centers for Disease Control and Prevention's Emerging Infections Program

(<https://www.cdc.gov/hai/eip/mugsi.html>). MuGSI performs active population and laboratory-based surveillance for carbapenem-resistant Enterobacteriaceae isolated from sterile sites and urine, covering more than 15 million people in 8 states. Surveillance is performed in selected counties in the following states: Colorado, Georgia, Maryland, Minnesota, New Mexico, New York, Oregon, and Tennessee. One of the objectives of MuGSI is to describe the population-based incidence of carbapenem-resistant *Klebsiella pneumoniae*.

*K. pneumoniae* isolates collected through MuGSI between 2012 and 2015 were streaked out on blood agar plates (TSA with 5% sheep blood; Thermo Sci Remel). String test was performed with a 1 $\mu$ L inoculation loop on a single colony. A positive string test result was greater than 5mm in length.

For murine infections, C57BL/6 mice were infected intraperitoneally with 10<sup>6</sup> CFU of *K. pneumoniae* strains (CDC98 or 3 different ST258 strains isolated from the New York MuGSI site). Mice were provided with food and water *ad libitum* and monitored for signs of illness or weight loss. Mice exhibiting weight loss to below 80% starting weight were euthanized.

Antibiotic susceptibility testing was performed using the MicroScan WalkAway 96 plus® (Beckman Coulter, Inc., Brea, CA) and Neg Breakpoint Combo Panel Type 44. S, susceptible; I, intermediate; R, resistant.

**Table S1. Antibiotic susceptibility profile of CDC98.**

| Antibiotic                    | Minimum Inhibitory Concentration (MIC) |
|-------------------------------|----------------------------------------|
| Amikacin                      | I (32µg/mL)                            |
| Ampicillin/Sulbactam          | R (≥32µg/mL)                           |
| Aztreonam                     | R (≥64µg/mL)                           |
| Cefazolin                     | R (≥64µg/mL)                           |
| Cefoxitin                     | R (16µg/mL)                            |
| Cefepime                      | R (4µg/mL)                             |
| Ceftazidime                   | R (≥64µg/mL)                           |
| Ceftriaxone                   | R (16µg/mL)                            |
| Gentamicin                    | S (≤1µg/mL)                            |
| Ertapenem                     | R (2µg/mL)                             |
| Levofloxacin                  | R (≥8µg/mL)                            |
| Meropenem                     | R (≥16µg/mL)                           |
| Piperacillin/Tazobactam       | R (≥128µg/mL)                          |
| Tetracycline                  | S (2µg/mL)                             |
| Tigecycline                   | S (1µg/mL)                             |
| Tobramycin                    | R (≥16µg/mL)                           |
| Nitrofurantoin                | R (256µg/mL)                           |
| Trimethoprim/Sulfamethoxazole | R (≥320µg/mL)                          |

**Table S2. Phenotypic and genetic traits of CR-hvKP strains CDC98 and K1.**

|                                       | CDC98              | K1                 |
|---------------------------------------|--------------------|--------------------|
| Origin                                | United States      | China              |
| Sequence type                         | ST258              | ST11               |
| Capsular type                         | K107               | K47                |
| Hypermucoviscous                      | +                  | +                  |
| pLVPKs                                | -                  | +                  |
| <i>rmpA</i>                           | -                  | -                  |
| <i>rmpA2</i>                          | -                  | +                  |
| Aerobactin receptor ( <i>iutA</i> )   | + <sup>c</sup>     | + <sup>p</sup>     |
| Salmochelins Receptor ( <i>iroN</i> ) | + <sup>c</sup>     | -                  |
| Carbapenemase                         | KPC-3 <sup>c</sup> | KPC-2 <sup>p</sup> |

*c* – chromosomal, *p* – plasmid.

## **Supplemental Figure Legends**

**Figure S1. CDC98 is string test positive (>5mm).**

**Figure S2. Quantification of CDC98 string test results.** The string test was performed by 6 independent, blinded testers on CDC98 as well as the indicated control, non-hypermucoviscous strains. Dotted line denotes 5 mm which is the cutoff for string test positivity.

## **Supplemental Movie Legend**

**Supplemental Movie S1. String test of CDC98.**

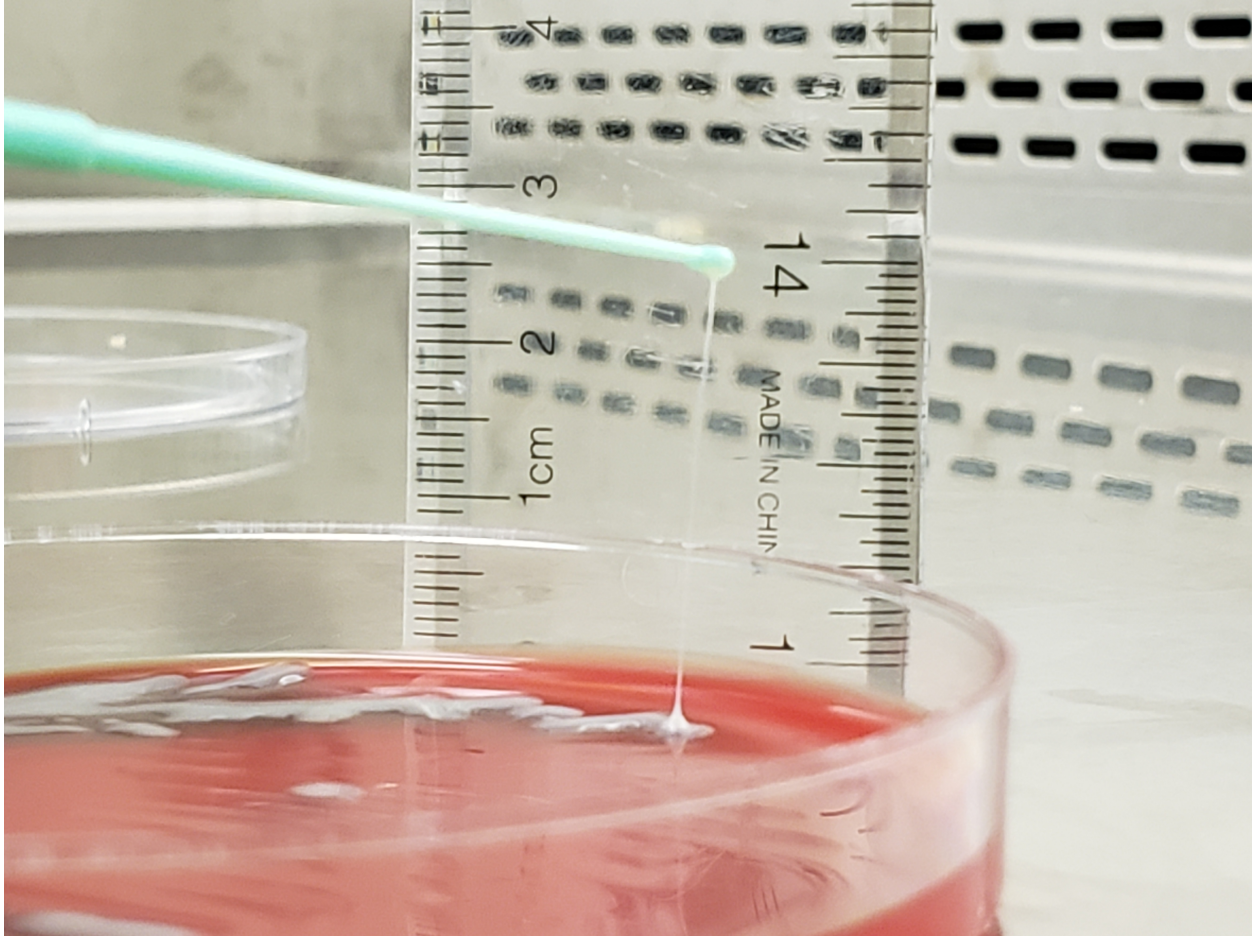

**Figure S1. CDC98 is string test positive (>5mm).**

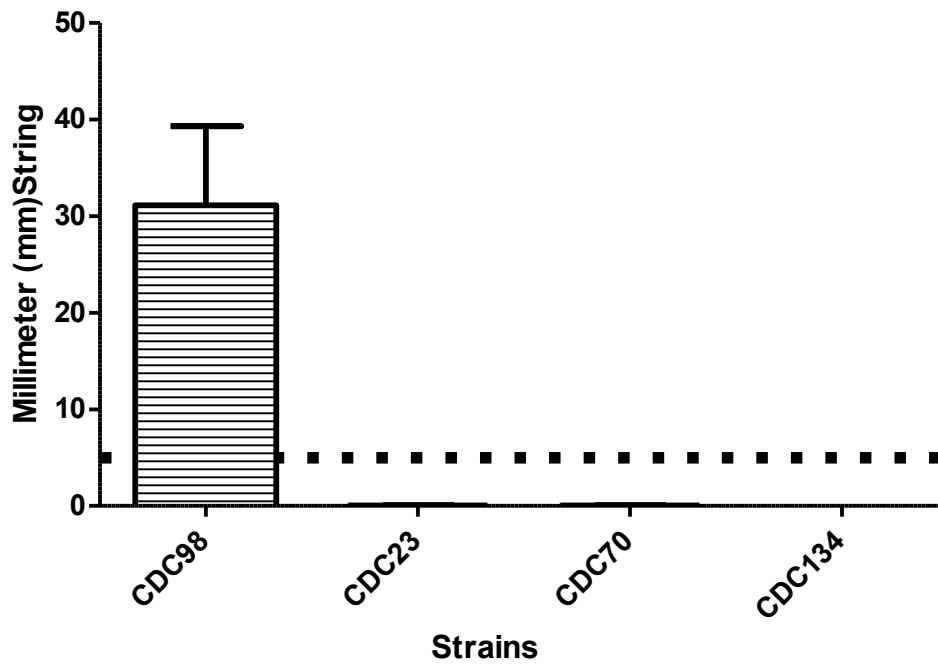

**Figure S2. Quantification of CDC98 string test results.** The string test was performed by 6 independent, blinded testers on CDC98 as well as the indicated control, non-hypermucoviscous strains. Dotted line denotes 5 mm which is the cutoff for string test positivity.
